# Supplementary material
Source: PubMed Central journal article supplement (PMC8296692)

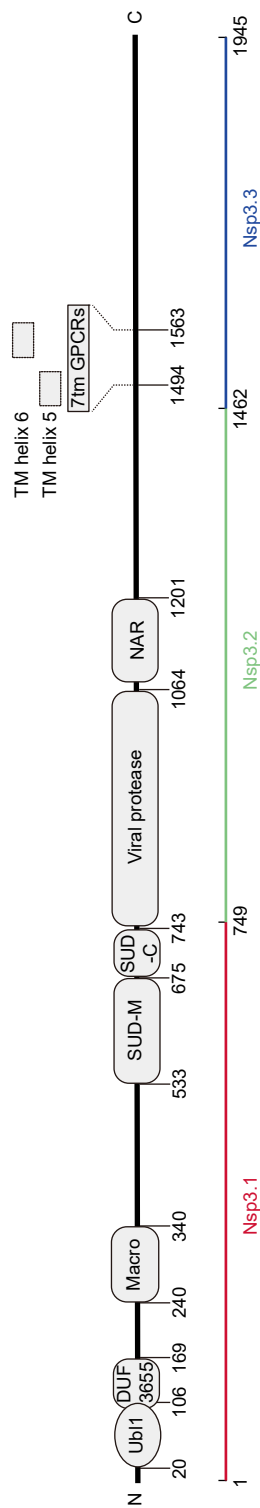

The Nsp3 of SARS-CoV-2 (ref. YP\_009725299.1), Ubi1, ubiquitin-like domain 1; DUF3655, protein of unknown function; SUD-M, single-stranded poly(A) binding domain; SUD-C, C-terminal SARS-Unique Domain; Viral protease, papain like viral protease; NAR, nucleic acid-binding domain; 7 tm GPCRs, seven-transmembrane G protein-coupled receptor superfamily. TM helix 5 and 6 are structural motifs.

**A**

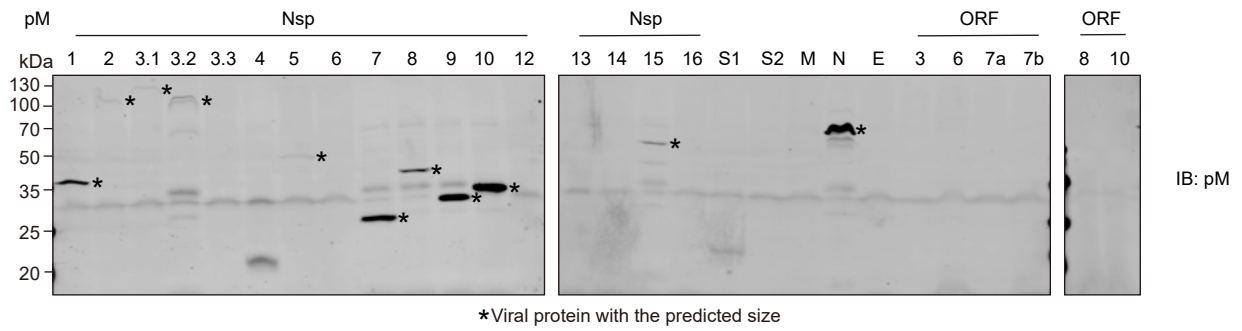

**B**

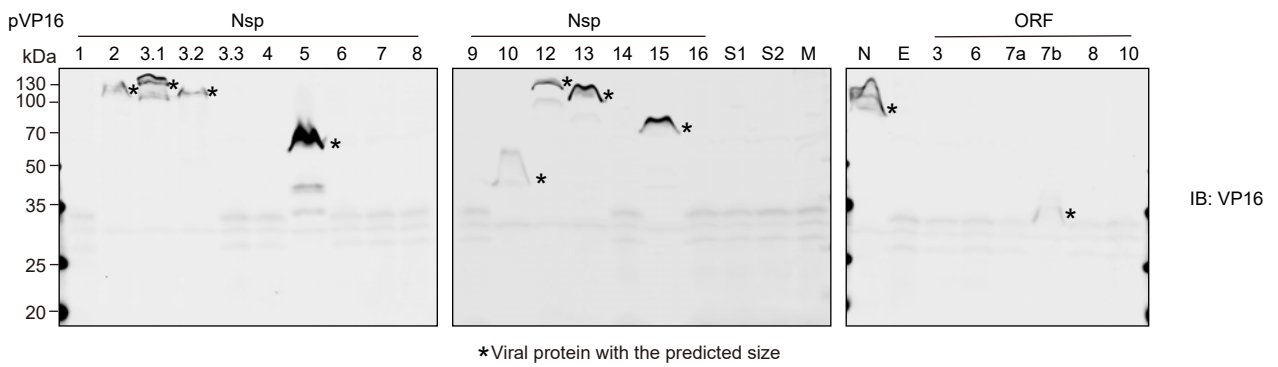

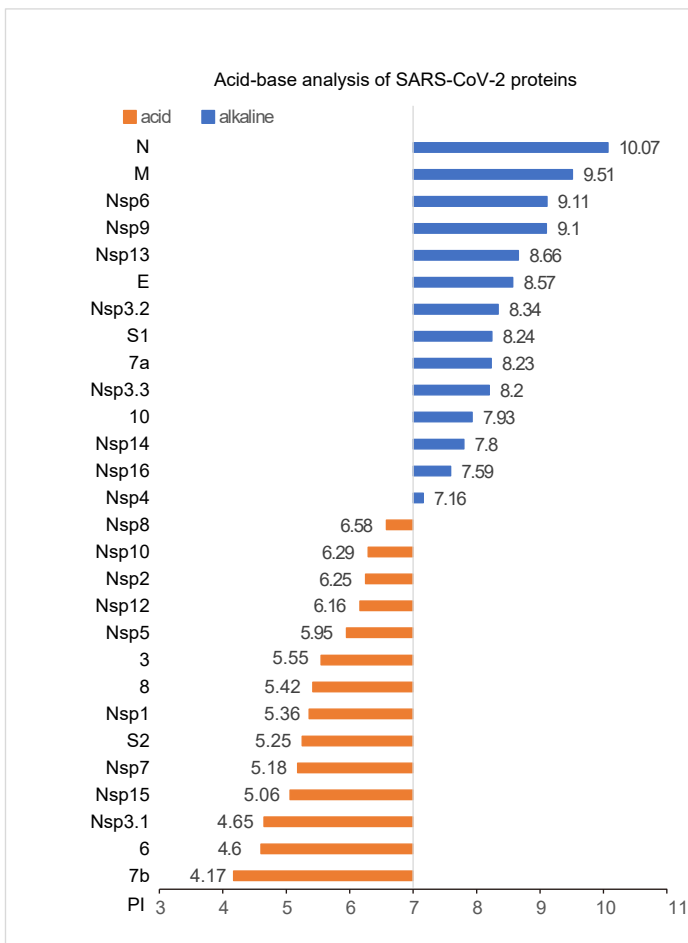

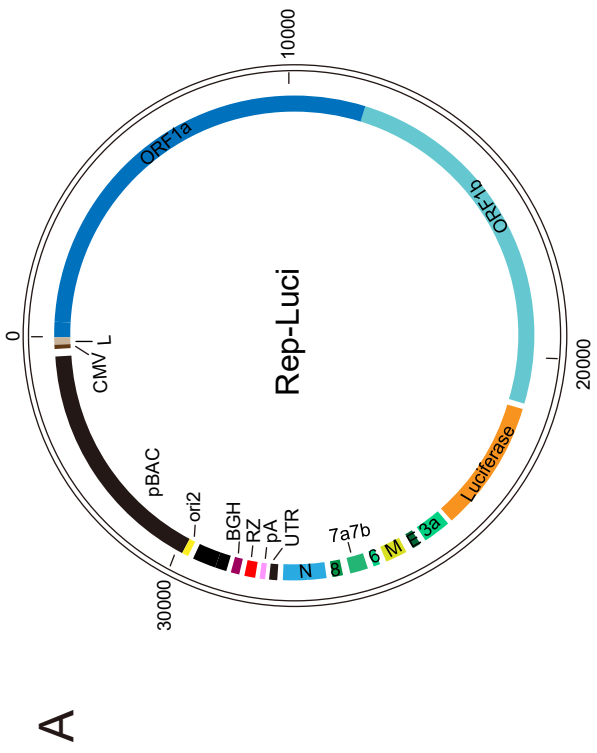

Replicon of SARS-CoV-2 with luciferase

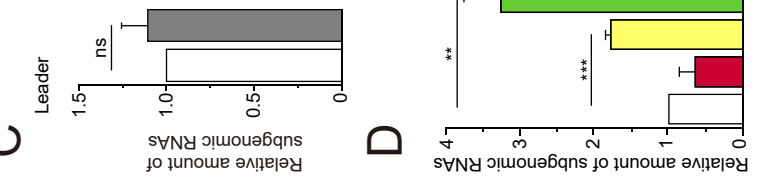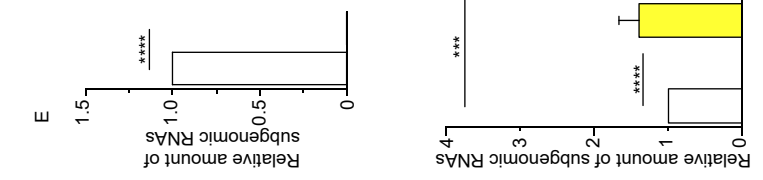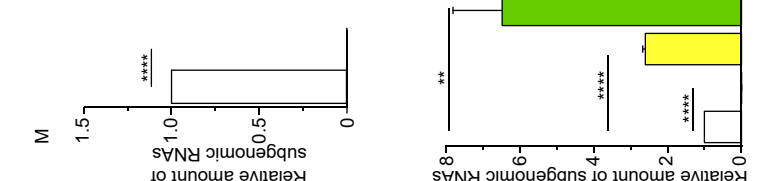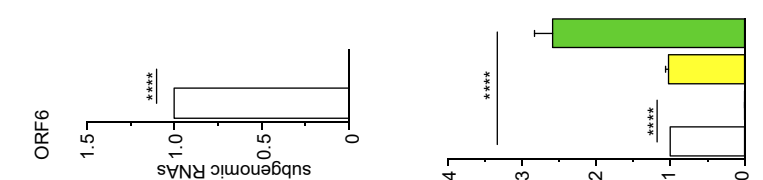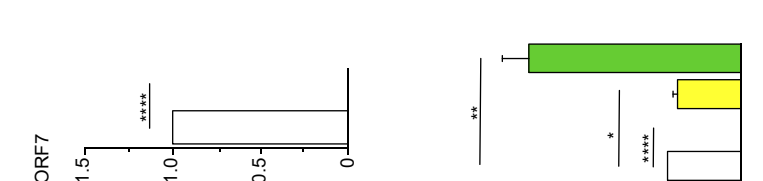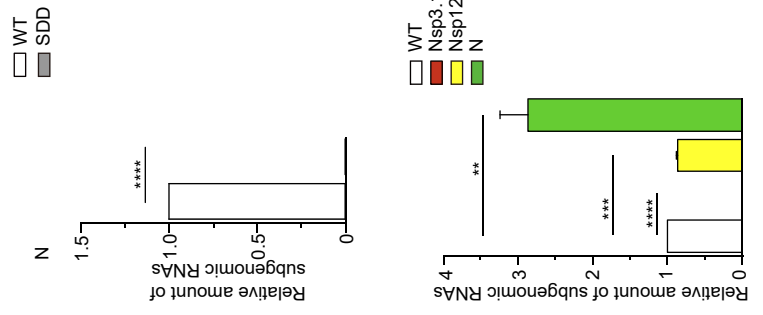

**B**

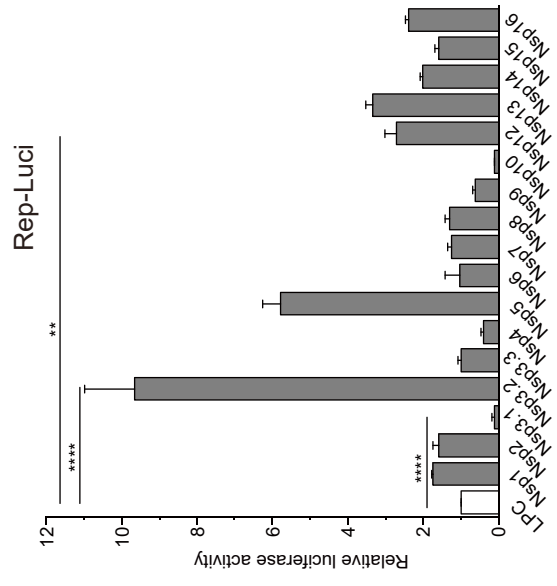

**D**

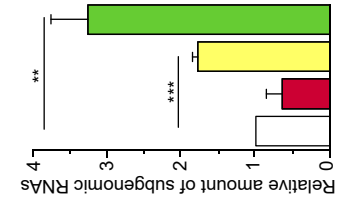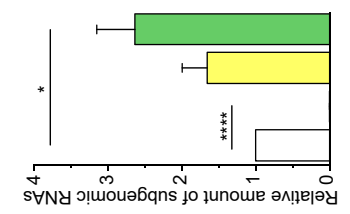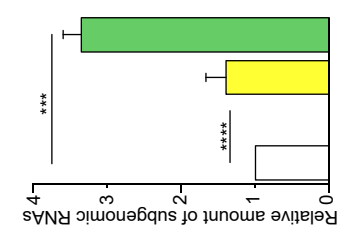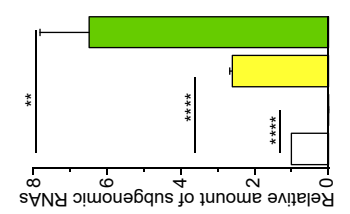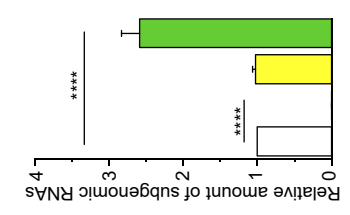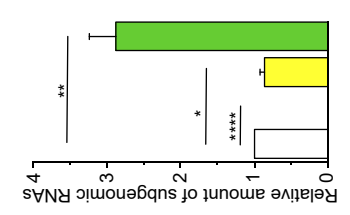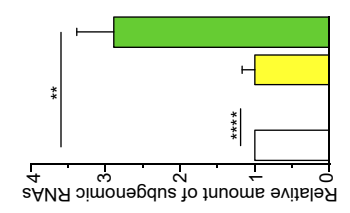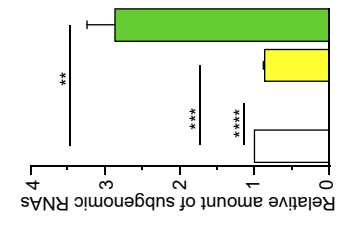

Supplement: 13578_2021_644_MOESM1_ESM.pdf [file 13578_2021_644_MOESM1_ESM.pdf]
